1 **High concentration and yield production of mannose from açai**  
2 **(*Euterpe oleracea*) seeds via diluted-acid and mannanase-catalyzed**  
3 **hydrolysis**

4  
5 Alvaro Ferreira Monteiro<sup>1a</sup>, Ingrid Santos Miguez<sup>1,2a</sup>, João Pedro R. Barros da Silva<sup>1</sup>,  
6 and Ayla Santana Silva<sup>1,2\*</sup>

7  
8 <sup>1</sup> Biocatalysis Laboratory, National Institute of Technology, Ministry of Science, Technology, Innovation  
9 and Communication, 20081-312, RJ, Brazil

10 <sup>2</sup> Federal University of Rio de Janeiro, Department of Biochemistry, 21941-909, RJ, Brazil

11  
12 <sup>a</sup> The authors contributed equally to the manuscript

13 \*Corresponding authors: Ayla Santana Silva (ayla.santana@int.gov.br)

14  
15 **Abstract**

16 The açai berry's seed corresponds to 85–95% of the fruit's weight and represents ~1.1  
17 million tons of residue yearly accumulated in the Amazon region. This study confirmed  
18 that mannan is the major component of mature seeds, corresponding to 80% of the  
19 seed's total carbohydrates and about 50% of its dry weight. To convert this mannan  
20 content into mannose, a sequential process of diluted-acid and enzymatic hydrolysis  
21 was evaluated. Diluted-H<sub>2</sub>SO<sub>4</sub> hydrolysis (3%-acid, 60-min, 121°C) resulted in a 30%  
22 mannan hydrolysis yield and 41.7 g/L of mannose. Because ~70% mannan remained in  
23 the seed, a mannanase-catalyzed hydrolysis was sequentially performed with 2–20%  
24 seed concentration, reaching 146.3 g/L of mannose and a 96.8% yield with 20% solids.  
25 As far as we know, this is the highest reported concentration of mannose produced from

26 a residue. Thus, this work provides fundamental data for achieving high concentrations  
27 and yields of mannose from açai seeds.

28

## 29 **Keywords:**

30 Açai seed, mannan, diluted-acid hydrolysis, mannanases, mannose

31

## 32 **Highlights**

- 33     ▪ Mannan was confirmed as the major component (~50%) of açai seeds.
- 34     ▪ Diluted-H<sub>2</sub>SO<sub>4</sub> hydrolysis had a limited effect on mannan conversion into  
35       mannose.
- 36     ▪ Enzymatic hydrolysis was sequentially performed with a high seed  
37       concentration.
- 38     ▪ Mannan was efficiently hydrolyzed by mannanases, producing a 96.8% yield.
- 39     ▪ Mannose production of 146.3 g/L was obtained with mannanase-catalyzed  
40       hydrolysis.

41

## 42 **Graphical abstract**

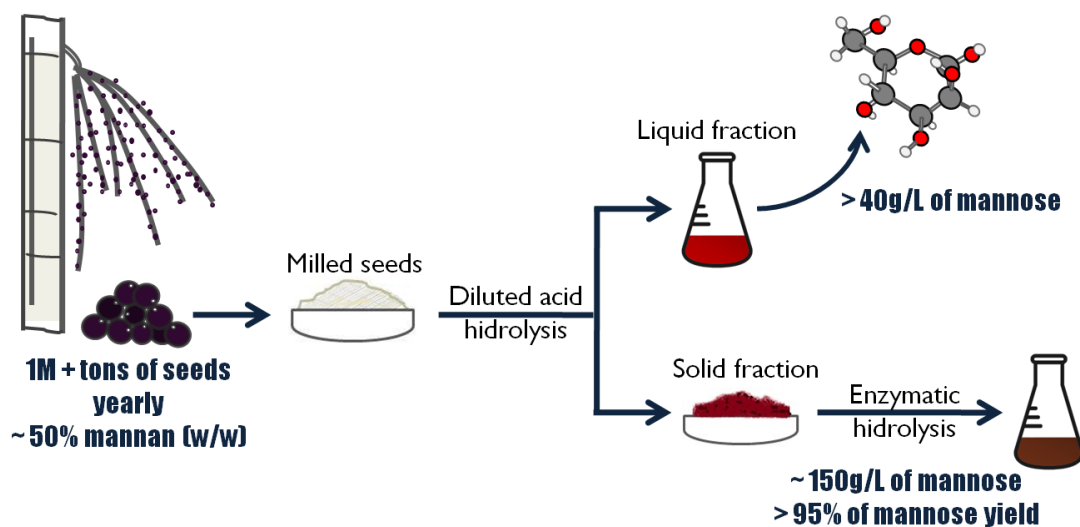

43

## 44 **1. Introduction**

45           The *Euterpe oleracea* palm plant—otherwise known as the açai palm—is a  
46 widely distributed plant in northern South America, with a large percentage of its  
47 population found in the delta region of the Amazonian river (Yamaguchi et al., 2015).  
48 In the past 15 years, the commercialization of its fruit—the açai berries—has  
49 experienced an economic boom, with a sizable increase seen in national and  
50 international markets, such as the United States, Japan, and Europe (Fioravanti, 2013;  
51 Nogueira et al., 2013). The main açai producer in the world is the Brazilian state of  
52 Pará, representing more than 95% of Brazil’s production. This state produced more than  
53 1,274,000 tons of açai berries in 2017 (<http://sidra.ibge.gov.br> and  
54 <http://www.sedap.pa.gov.br>), and governmental incentives were recently created (Pró-  
55 Açai Program) to increase the production by 360,000 tons by 2024.

56           The commercialized product—the açai pulp—represents only 5–15% of the  
57 fruit’s weight, whereas the açai seed accounts for the other 85–95% (Pessoa et al., 2010;  
58 Pompeu et al., 2009). The rapid increase of açai commercialization has generated an  
59 enormous amount of açai seeds as a residue of the extraction process, which is  
60 estimated at more than 1,000,000 tons deposited yearly in the Amazon region, with the  
61 prospect of more in the coming years. Today, only a small amount of the seeds is  
62 utilized for animal feed, plantations, or home gardens and crafts, and very few  
63 appropriate disposal methods currently exist, resulting in an acute environmental and  
64 urban problem (Fioravanti, 2013). It is of great environmental and economic interest to  
65 avoid waste production and simultaneously find new applications for açai seeds, thus  
66 adding value to the productive chain and promoting local and social development.

67           To extract the highest possible value from this residue and determine the  
68 appropriate applications, it is of the utmost importance to know its composition, but few

69 systematic studies have been carried out with açai seeds. Previous works have reported  
70 that açai seeds contain high amounts of carbohydrates (~70%), with cellulose being the  
71 main polysaccharide (Altman, 1956; Oliveira et al., 2015, 2013; Rodríguez-Zúñiga et  
72 al., 2008; Wycoff et al., 2015). In contrast, Rambo et al. have shown that 53.8% of the  
73 seed is composed of mannan, a polymer of mannose (Rambo et al., 2015). Therefore,  
74 the confirmation of the actual composition of the açai seed and studying the processing  
75 methods to release its sugars is extremely relevant because the possibly unprecedented  
76 mannose content renders açai seeds as a valuable and unexplored material.

77         One alternative to explore the açai seed's potential is to develop mild methods  
78 that efficiently release sugars from the material. Commonly, diluted inorganic acids,  
79 including sulfuric acid and hydrochloride acid, have been employed to hydrolyze the  
80 xylan content of some lignocellulosic biomasses with more than 90% efficiency,  
81 resulting in a liquid fraction rich in free xylose and a solid residue rich in cellulose and  
82 lignin. However, very few studies have focused on the depolymerization of mannans  
83 because very few industrially relevant residues are rich sources of this polysaccharide.  
84 Nevertheless, some studies have indicated that mannan-containing hemicelluloses, such  
85 as softwoods, may be less prone to the action of diluted sulfuric acid (Lim and Lee,  
86 2013). On the other hand, mannan-degrading enzymes could also be applied for the  
87 release of free mannose from açai seeds, independently or in a sequential step after  
88 diluted-acid processing (Kusakabe et al., 1987; Srivastava and Kapoor, 2017; van Zyl  
89 et al., 2010). Up to now, there are no reports of studies aiming to release mannose from  
90 açai seeds, which is a sugar with a high potential to be a functional ingredient and that  
91 exhibits biological functions of great interest in the cosmetic, pharmaceutical, and food  
92 industries (Ariandi et al., 2015; Otieno and Ahring, 2012; Rungrassamee et al., 2014).

93 For example, mannose can be easily reduced to mannitol—a specialty chemical with a  
94 wide variety of uses in the pharmaceutical industry—in a process with a 90% yield  
95 (Mishra and Hwang, 2013). However, because of the lack of abundant and low-cost  
96 sources of mannose, the conventional industrial processes for mannitol production are  
97 based on the chemical hydrogenation of fructose or inverted sucrose, which produce  
98 low yields of about 25% and 50%, respectively (Makkee et al., 1985).

99 Considering that açai seeds can be a potential rich source of mannan, its high  
100 abundance in Brazil, and the limited current knowledge of mannan depolymerization,  
101 the aim of the current study was to confirm the carbohydrate composition of açai seeds  
102 and to evaluate acidic- and enzymatic-catalyzed strategies to maximize mannose  
103 production.

104

## 105 **2. Material and Methods**

### 106 **2.1. Source of materials**

107 Açai seed samples were kindly donated by the company Açai Amazonas.  
108 Mannanase BGM “Amano” 10 was kindly provided by Amano Enzyme Inc. (Japan).  
109 All other chemicals were purchased from commercial sources and used without any  
110 further purification.

111

### 112 **2.2. Characterization of açai seeds**

113 Two lots of açai seeds were characterized in the current study. Samples from lot  
114 1 were received as shown in Figure 1a and were noted as “whole seeds” (Fig. 1a),  
115 while lot 2 contained samples already milled (Fig. 1d). For characterization, the whole  
116 seeds samples from lot 1 were processed with a knife mill as received. Alternatively,  
117 for lot 1 samples, the external fiber layers (Fig. 1c) were manually separated from the

118 inner core stones (Fig. 1b), and the two fractions were milled separately for further  
119 chemical characterization. In parallel, the masses of 35 whole seed samples were  
120 measured using an analytical balance (0.001 precision). Subsequently, the external  
121 fiber layers were manually removed from the core stones and then both were weighted  
122 separately to determine their percentage in relation to the total mass of the whole seed.

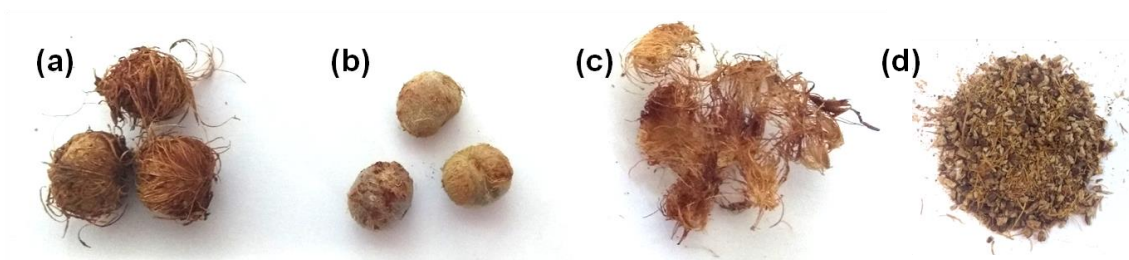

123  
124 **Figure 1.** Açai seed samples: (a) whole seeds; (b) core stone after removing the external fibers;  
125 (c) fiber layer; (d) milled whole seeds.

126

### 127 **2.2.1. Determination of extractives, carbohydrates, and acid insoluble solids**

128 *In natura* milled açai seeds underwent an extraction process (Sluiter et al., 2008)  
129 with some modifications. Approximately 2 g of the biomass were weighted into  
130 cellulose thimbles and extracted with water, which was followed by a 95% ethanol  
131 extraction; each extraction step was performed for at least 12 h. The procedure was  
132 carried out using six Soxhlet apparatus in parallel. By the end of the extraction, three of  
133 the thimbles were put in a 105 °C drying oven overnight to calculate the extractives by  
134 weight difference, while the other three were put in a 40 °C drying oven to be used in  
135 the following chemical characterization step. Then, 0.3 g of the dried, extractive-free *in*  
136 *natura* and acid-treated açai seed samples were submitted to an acid hydrolysis process  
137 in two steps in triplicate (Sluiter et al., 2012). In the first step, the samples were mixed  
138 with 3 mL of a 72% sulfuric acid solution in round-bottom hydrolysis tubes and put in  
139 a 30 °C water bath for 1 h under constant stirring. In the second step, 84 mL of  
140 deionized water were added to the tubes, which were autoclaved for 1 h at 121 °C.

141 After this, the solutions were vacuum filtered through dried, preweighted Gooch  
142 crucibles. The acidic liquors were neutralized with  $\text{CaCO}_3$  and went through HPLC and  
143 HPAEC-PAD analysis, which is described below, for carbohydrate quantification. The  
144 crucibles containing the remaining solids were dried overnight in an oven at 105 °C,  
145 and the dry weight was recorded for acid insoluble solids (AIS) quantification using the  
146 difference in weight. The insoluble ash content was also measured using the difference  
147 in weight after the same crucibles were put overnight in a furnace at 575 °C.

148

### 149 **2.2.2. X-ray diffraction analysis**

150 X-ray diffraction (XRD) analyses of the milled açai seed samples were  
151 performed using Bruker's D8 Advance equipment, Cu  $K\alpha$  radiation ("lambda" = 1.5418  
152 angstroms), 40 kVA voltage and 40 mA current, a scanning angle in the range of  $2 \leq 2\theta$   
153  $\leq 60$  degrees, and acquisition time of 0.6 s per step.

154

### 155 **2.3. Diluted-acid hydrolysis of açai seeds for mannose release**

156 Four sulfuric acid concentrations were evaluated for the diluted-acid hydrolysis  
157 step, corresponding to 1.5%, 3.0%, 3.5%, and 4.5% (% w/w). Each of these solutions  
158 was evaluated at a 30- and a 60-min residence time at 121 °C. Each condition was  
159 performed in at least four replicates in round-bottom hydrolysis tubes containing 4 g  
160 (dry weight) of the milled açai seeds and 16 mL of the corresponding diluted-acid  
161 solution, resulting in a solid:liquid ratio of 1:4. The tubes were put in an autoclave for  
162 30- or 60-min at 121 °C and then cooled in an ice bath. After this, 64 mL of water were  
163 added to the tubes, which were agitated for homogenization, and samples of the liquid  
164 streams were withdrawn, being then filtrated, neutralized, and prepared for HPLC and

165 HPAEC-PAD analysis, to determine the sugar and degradation products, as described  
166 below.

167 The solid contents of two of the four tubes were filtrated in preweighted fiber  
168 glass filters and put in an oven at 105 °C overnight to calculate the amount of mass  
169 transferred to the acidic liquid phase. The solid contents of the other two tubes were  
170 filtered and stored in the refrigerator until further use either for characterization of the  
171 chemical composition or for enzymatic hydrolysis assays. Prior to the characterization  
172 assays, the samples were dried at 40 °C until reaching less than 10% moisture and then  
173 used for the determination of AIS, ash, and carbohydrates, as previously described.

174 The combined severity factor was calculated for each diluted-acid hydrolysis  
175 condition, which was evaluated based on the severity factor  $R_0$ , which accounts for the  
176 effect of the temperature, residence time, and pH of the hydrolysates after the reaction,  
177 through the expression  $\text{Log } R_0\text{-pH}$ , where  $\text{Log } R_0$  is given by equation [1] (Ferreira-  
178 Leitão et al., 2010):

$$179 \quad \text{Log}(R_0) = \text{Log} \left[ t \times \exp \left( \frac{T-100}{14.75} \right) \right] \text{ [Eq. 1]}$$

180 where  $t$  is the reaction time of the pretreatment in minutes, and  $T$  is the reaction  
181 temperature in °C.

182

#### 183 **2.4. Enzyme activity measurements and enzymatic hydrolysis assays**

184 The endomannanase activity of mannanase BGM “Amano” 10 was determined  
185 using a 0.5% locust bean gum (Sigma-Aldrich) solution as the substrate. The enzyme  
186 solution was diluted in a 50 mM sodium citrate buffer (pH 4.8), and an aliquot of 0.25  
187 mL was mixed with 0.25 mL of the substrate solution and incubated in a water bath for  
188 30 min at 50 °C. Then, 0.5 mL of 3,5-dinitrosalicylic acid (DNS), prepared according  
189 to Teixeira et al. (2012), was added to each tube after 30 min of incubation to stop the



190 reaction, and the tubes were put in a boiling water bath for 5 min. The absorbance of  
191 the colored solutions was measured via spectrophotometer (ThermoScientific Evolution  
192 201) at a wavelength of 540 nm to quantify the reducing sugars. One unit of  
193 endomannanase was defined as the amount of enzyme required to release 1  $\mu\text{mol}$  of  
194 reducing sugars equivalent to mannose in 1 min at 50 °C.

195  $\beta$ -mannosidase activity was determined by adding 100  $\mu\text{L}$  of 10 mM of 4-  
196 nitrophenyl  $\beta$ -D-mannopyranoside to 200  $\mu\text{L}$  of a 0.5 M sodium citrate buffer (pH 4.8),  
197 600  $\mu\text{L}$  of distilled water, and 100  $\mu\text{L}$  of an appropriately diluted enzyme sample. The  
198 assay was incubated at 50 °C for 10 min, and the reaction was stopped with the  
199 addition of 500  $\mu\text{L}$  of 1.0 M sodium carbonate. The liberation of *p*-nitrophenol was  
200 monitored via spectrophotometer at a wavelength of 405 nm. One unit of  $\beta$ -mannanase  
201 was defined as the amount of enzyme that released 1  $\mu\text{mol}$  of *p*-nitrophenol for 1 min at  
202 50 °C.

203 The enzymatic hydrolysis assays were performed in 50-mL flasks, with a total  
204 assay mass of 20 g containing 2–20% (w/w) of biomass (native seeds and seed samples  
205 after the acid hydrolysis) based on its dry weight, the enzyme solution in a 0.05 M  
206 sodium citrate buffer (pH 4.8), and 0.02% sodium azide. The amount of enzyme added  
207 was such that the mannanase activity load was 400 UI per gram of biomass, which was  
208 established in the preliminary assays. The flasks were incubated in a shaker at 50 °C  
209 and 200 rpm. Aliquots were withdrawn at 0, 2, 6, 24, 48, and 72 h and analyzed by  
210 HPLC for sugar quantification. Mannose yields were calculated according to equation  
211 [2].

212

213 Mannose yield (%) = 
$$\frac{(C_{\text{mannose}} - C_{\text{mannose}_0})^{0.9}}{\left(\frac{W_{\text{seed}}}{V_0}\right) F_{\text{mannan}}} \times 100$$
 [2]

214

215 where  $C_{\text{mannose}}$  is the mannose concentration in the hydrolysates (g/L);  $C_{\text{mannose}_0}$  is  
216 the initial mannose concentration in the hydrolysis assay;  $W_{\text{seed}}$  is the total weight of  
217 the seed in the hydrolysis assay (g);  $V_0$  is the initial volume of the liquid (L);  $F_{\text{mannan}}$   
218 is the initial mass fraction of mannan in samples.

219

## 220 **2.5. Chromatographic conditions**

221 Sugars and acetic acid were quantified by HPLC using an Ultimate 3000 system  
222 (Thermo Scientific, USA) equipped with a refractive index detector RI-101 (SHODEX,  
223 Japan). For sugar quantification, an Aminex HPX-87P (300 x 7.8 mm, Bio-Rad)  
224 column was used, with a Carbo-P precolumn (Bio-Rad, USA) and an inline deashing  
225 system (Bio- Rad). The mobile phase used ultrapure water at a flow rate of 0.6 mL/min  
226 with an oven temperature of 80 °C and detector temperature of 60 °C. The sugar  
227 composition of açai seed samples and of acidic and enzymatic hydrolysates were also  
228 cross-checked by monosaccharides and disaccharides identification and quantification  
229 using a Thermo Scientific Dionex ICS-5000 system (Canada) using high-performance  
230 anion exchange chromatography with pulse amperometric detection (HPAEC-PAD).  
231 The guard cartridge and analytical column used were the CarboPac PA1 (Thermo  
232 Scientific, 4 mm x 50 mm and 10  $\mu\text{m}$  particle sizes) and CarboPac PA1 (Thermo  
233 Scientific, 4 mm x 250 mm and 10  $\mu\text{m}$  particle sizes). The column temperature was 15  
234 °C, and the mobile phase was composed of phase A (type 1 reagent-grade deionized  
235 water) and phase B (300 mM NaOH solution). The gradient programs used for the  
236 separation were as follows: 0.0–32.0 min, 0% B; 32.0–32.1 min, 0–85% B; 32.1–42.0  
237 min, 85% B; 42.0–42.1 min, 85–0% B; and 42.1–52.0 min, 0% B. The flow rate was  
238 1.25 mL/min, and the injection volume was 5  $\mu\text{L}$ . The system was also equipped with a  
239 postcolumn addition of 450 mM NaOH solution with a flow rate of 0.8 mL/min.

240 The acetic acid was quantified using an Aminex HPX-87H (300 x 7.8 mm, Bio-  
241 Rad) column with a Carbo-H precolumn (Bio-Rad, USA) and an inline deashing  
242 system (Bio- Rad). The mobile phase was 5 mM H<sub>2</sub>SO<sub>4</sub> at a flow rate of 0.6 mL/min  
243 with oven and detector temperatures of 30 °C and 45 °C, respectively. Furfural,  
244 hydroxymethylfurfural, and phenolic compounds (gallic acid, hydroxybenzoic acid,  
245 vanillin, ferulic acid, and cinnamic acid) were quantified with the diode array detector  
246 DAD-3000 (Thermo Scientific, USA). The column was a LiChroCART RP-18e (4.6 ×  
247 250 mm, Merck, Germany) equipped with the precolumn LiChroCART RP-18e (4.0 ×  
248 4.0 mm, Merck, Germany). The mobile phase was composed of phase A (type 1  
249 reagent-grade deionized water) and phase B (methanol) at a flow rate of 0.4 mL/min,  
250 with oven temperatures of 30 °C and detector wavelengths of 280 and 320 nm. The  
251 gradient programs used for separation were as follows: 0.0–3.1 min, 15% B; 3.1–8.1  
252 min, 65% B; 8.1–8.2 min, 95% B; 8.1–9.9 min, 95% B; 9.9–14.0 min, 0% B; 14.0–19.0  
253 min, 15% B. Concentrations were quantified by external calibration.

254

### 255 **3. Results and Discussion**

#### 256 **3.1. Açai seed chemical characterization**

257 First, 35 samples of dried mature açai seed samples were weighted to determine  
258 the proportion of the mass of the external fiber layer to the whole seed samples (Figure  
259 1). By botanical definition, the external fiber layer is not considered part of the seed;  
260 however, we denominated the seed as the residue generated after the depulping and  
261 sieving of açai berries (fibers + seed) because—for the sake of brevity—it is  
262 improbable that any large-scale commercial use of this residue will separate those  
263 fractions.

264           The average weight of the whole seeds was  $0.78 \text{ g} \pm 0.12$ , ranging from 0.56 g to  
265   1.06 g, and the mass percentage of fiber in relation to the whole seed was equivalent to  
266    $5.97\% \pm 1.45$ . These data are in close agreement with a previous study that reported  
267   that the whole seeds average weight was  $0.72 \pm 0.04 \text{ g}$  and that the fibrous layer  
268   corresponded to 6.50% of the whole seed weight (Pessoa et al., 2010).

269           The literature data regarding the açai seed composition so far is conflicting.  
270   Therefore, to better evaluate the seed's uses, a confirmation of its chemical  
271   composition is crucial to design the most suitable processing methods for sugar  
272   recovery. In the current study, the characterization of two distinct seed samples lots  
273   was performed, as well as an analysis of different seed fractions. Table 1 presents the  
274   composition of the milled samples of whole seed from the two lots and of the core  
275   stones and fiber layer of one lot. The composition of the whole seed showed that the  
276   material is mostly composed of carbohydrates, with mannan—a polymer of mannose—  
277   being its main component and corresponding to 47.09% and 52.46% of its total dry  
278   weight for lot 1 and lot 2, respectively. Smaller amounts of other structural sugars were  
279   also identified, such as glucose, xylose, galactose, and arabinose. Rambo et al. (2015)  
280   reported a similar composition for açai seeds, corresponding to 53.6% mannose, 8.66%  
281   glucose, 3.18% xylose, 1.43% galactose, 0.69% arabinose, and 0.17% rhamnose. The  
282   seed's lipid content was not analyzed in the current study; however, it has been  
283   reported that *Euterpe oleracea* seeds contain only 0.33% total fat (Wycoff et al., 2015).

284

285

286

287

288

289 Table 1. Chemical composition of the whole açai seeds from two different lots and of  
 290 the core stone and fiber layer of one lot, here expressed as a percentage of dry matter.

| Component        | Dry mass (%)          |                       |                        |                                    |
|------------------|-----------------------|-----------------------|------------------------|------------------------------------|
|                  | whole seed<br>(lot 1) | Core stone<br>(lot 1) | Fiber layer<br>(lot 1) | whole seed <sup>a</sup><br>(lot 2) |
| Anhydromannose   | 47.09 ± 1.42          | 47.19 ± 2.58          | nd <sup>c</sup>        | 52.46 ± 1.51                       |
| Anhydroglucose   | 6.09 ± 0.67           | 4.61 ± 0.48           | 21.88 ± 0.46           | 8.40 ± 0.52                        |
| Anhydroxylose    | 1.83 ± 0.33           | 1.13 ± 0.16           | 15.12 ± 0.39           | 2.05 ± 0.22                        |
| Anhydrogalactose | 1.79 ± 0.21           | 2.61 ± 0.12           | 0.90 ± 0.04            | 1.51 ± 0.27                        |
| Anhydroarabinose | 0.40 ± 0.02           | 0.85 ± 0.03           | 0.82 ± 0.03            | 0.63 ± 0.03                        |
| AIS <sup>b</sup> | 18.34 ± 0.64          | 18.36 ± 0.61          | 31.80 ± 0.36           | 19.54 ± 1.56                       |
| Extractives      | 15.45 ± 0.95          | 16.72 ± 2.43          | 12.89 ± 1.88           | 9.89 ± 2.09                        |
| Ash              | 0.61 ± 0.09           | 0.41 ± 0.03           | 2.12 ± 0.06            | 0.44 ± 0.02                        |

291 <sup>a</sup> The characterization of the core stones and fibers are shown only for lot 1 because lot 2 was received  
 292 milled from the producer. <sup>b</sup> AIS: acid insoluble solids account for the organic matter that was insoluble  
 293 after acid hydrolysis condition and is calculated by not counting the amount of acid insoluble ash. <sup>c</sup> nd:  
 294 not detected.  
 295

296 The composition of the core stones (Fig. 1b) showed a high similarity with the  
 297 whole seed, as expected, considering that this fraction corresponds to almost 94% of  
 298 the whole seed's mass. The fibers, however, presented a distinct sugar profile with no  
 299 detectable mannose content and higher contents of glucan, xylan, and AIS when  
 300 compared with the core stone. AIS can be presumably counted as lignin; however,  
 301 because açai seeds are quite different from typical lignocellulosic biomass, further  
 302 analyses of this AIS are required to confirm if all of its content corresponds to the  
 303 lignin. The high percentage of extractives in açai seeds is in accordance with its  
 304 reported polyphenolic polymeric procyanidins content (Melo et al., 2016).  
 305 Nevertheless, it is possible that not all the content of the polymeric procyanidins is  
 306 accounted for in the extractives because hydrogen bonds can be formed between the  
 307 hydroxyl groups of polyphenols and oxygen of the glycosidic linkages of  
 308 polysaccharides, making procyanidins imprisoned in the cell wall of carbohydrates and  
 309 not extractable using organic solvents (Jakobek, 2015).

310           The high mannan content confirmed in the current study contradicts most studies  
311 reporting on açai seeds' composition, which have stated cellulose as the main  
312 polysaccharide in the seed (Altman, 1956; Oliveira et al., 2015, 2013; Rodríguez-  
313 Zúñiga et al., 2008; Wycoff et al., 2015). Although Rambo et al. (2015) quantified the  
314 carbohydrate content of açai seeds and reported mannan as the main polysaccharide, no  
315 further discussion was made about this finding in that study. The fact that many studies  
316 reported a high cellulose content in the seed could be related to the use of indirect  
317 methods to determine the material's composition, which measure the total fiber content  
318 instead of specific sugar quantification using chromatographic methods. For example,  
319 Altman (1956) employed a method developed by Waksman and Stevens (1930) that  
320 assumes the presence of cellulose and hemicellulose in the sample by quantifying  
321 reducing sugars without specifically identifying the structural carbohydrates. Wycoff et  
322 al. (2015) have analyzed açai seed samples by nuclear magnetic resonance and  
323 observed peaks related to glycosidic bonds, inferring that these were related to  
324 cellulose and hemicellulose and citing previous studies that indicate cellulose as the  
325 seed's main polysaccharide.

326           Cellulose has an unusual crystallinity among biopolymers, and XRD is the most  
327 commonly used technique to obtain data for cellulose crystallinity. Therefore, XRD  
328 analyses were performed to verify if the açai seed samples had the typical diffraction  
329 profile of materials containing high amounts of cellulose. Figure 2 presents the XRD  
330 profiles of the milled samples of the whole açai seeds (stone plus fibers), the açai seed  
331 stone, and the fibers.

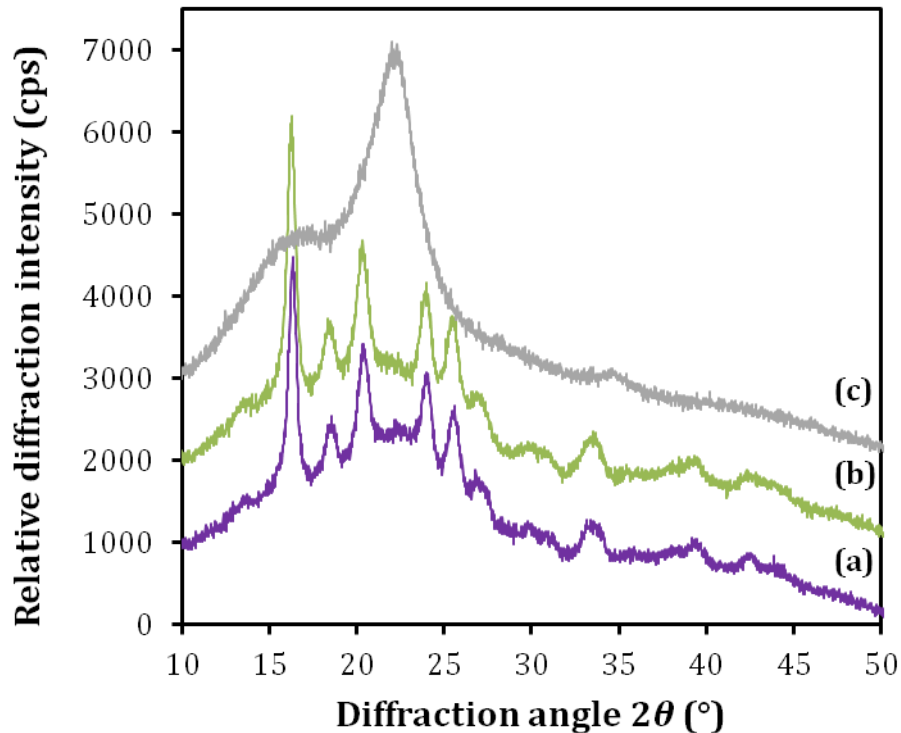

332

333 **Figure 2.** XRD profiles of the milled samples of (a) whole açai seed; (b) açai seed core  
334 stone, and (c) açai seed fibers.

335

336 The açai seed fiber presented a typical cellulose I diffraction pattern with two  
337 peaks at  $2\theta$  equal to 16.0 and 22.0, which correspond to the cellulose crystal planes 110  
338 and 200, respectively (French and Santiago, 2013). The fibers' XRD profile was very  
339 similar to the ones found for other agricultural residues, such as sugarcane bagasse and  
340 wheat straw, which are biomasses that contain ~40% cellulose (Da Silva et al., 2010).  
341 These data are in accordance with the macroscopic aspect of the fibrous material, as  
342 well as with its high glucan content. However, the samples of milled whole seeds or  
343 açai stones did not show a diffraction peak corresponding to the cellulose crystalline  
344 plane 200. A comparison of the diffraction patterns, which were completely different in  
345 the 15°–25° region, which is characteristic of cellulose crystals, also corroborates the

346 sugar composition data for each fraction analyzed, confirming that açai seeds do not  
347 contain cellulose as their main polysaccharide.

348         This high mannose content in açai seeds is supported by the fact that the  
349 secondary walls of the endosperm cells in the seeds of many species contain very little  
350 cellulose (Bento et al., 2013); these consist of noncellulosic cell wall storage  
351 polysaccharides that are digested during germination, being usually mannans,  
352 galactomannans, glucomannans, xyloglucans, and galactans (Aspinall, 1959; Moreira  
353 and Filho, 2008; Scheller and Ulvskov, 2010). However, it is interesting that the açai  
354 seed's mannan content of about 50% of its dry weight is quite high, even though  
355 mannans can be common cell wall storage polysaccharides. Most vegetal biomasses,  
356 such as grasses and hardwoods, have low amounts of mannose (<2%), while softwood  
357 can reach up to 15% (Hu et al., 2016). Palm kernel cakes, copra meal, and spent coffee  
358 grounds are agro-industrial residues with the highest reported mannose content,  
359 reaching 35%, 28%, and 22% of their dry weight, respectively (Bradbury and Halliday,  
360 1990; Fan et al., 2014; Kusakabe et al., 1987).

361         The reported chemical structure and composition of other mannose-rich seeds or  
362 residues indicate that the most common polysaccharides in these materials are  $\beta$ -1,4-  
363 mannan and/or galactomannan, which has a (1 $\rightarrow$ 4)- $\beta$ -D-mannopyranosyl backbone and  
364 can alternatively be substituted by  $\alpha$ -D-galactopyranosyl residues at position O-6  
365 (Bento et al., 2013; Moreira and Filho, 2008). For example, the endosperm of many  
366 seeds from small leguminous trees, as well as the locust bean and guar gums, have  
367 galactomannan as the main polysaccharide, with a galactose:mannose molar ratio of 1:2  
368 to 1:4 (Moreira and Filho, 2008). In contrast, the mature palm kernel, coconut copra  
369 meal, ivory nuts, and green coffee beans have mannans composed of linear chains of  
370 1,4-linked  $\beta$ -D-mannopyranosyl residues that contain less than 5% galactose and small



371 amounts of other polysaccharides (Aspinall, 1959). Therefore, considering the  
372 monosaccharide's profile obtained from the acid hydrolysis of açai seeds (Table 1) and  
373 the data from the literature for other seeds, it is hypothesized that a linear  $\beta$ -1,4-mannan  
374 is the main polysaccharide of the mature açai seed. The very low content of galactose  
375 in mature açai seeds renders the presence of galactomannan unlikely because this  
376 polysaccharide is reported to have a galactose:mannose molar ratio of 1:2. However,  
377 further studies to elucidate the carbohydrate structure will be necessary.

378

### 379 **3.2. Effect of acid hydrolysis for mannose release from açai seeds**

380 Moderate diluted-acid hydrolysis was evaluated as a possible strategy to release  
381 mannose from açai seeds through the breakdown of the mannan, making the  
382 monomeric sugars readily available in the acid's liquid phase. Acid hydrolysis was  
383 evaluated at a fixed temperature of 121 °C and by varying the H<sub>2</sub>SO<sub>4</sub> concentration and  
384 residence time. Table 2 presents the severity factor for each condition evaluated, the  
385 percentage of insoluble solids recovered, and its chemical composition and the sugar  
386 composition of the hydrolysates obtained.

387 Table 2. Characterization of the recovered insoluble solids and sugar composition of the hydrolysates from the acid hydrolysis of açai seeds at  
 388 different H<sub>2</sub>SO<sub>4</sub> concentrations and residence times.

| % H <sub>2</sub> SO <sub>4</sub> (m/m) | Time (min) | % RIS <sup>a</sup> | R <sub>0</sub> <sup>b</sup> | Content in recovered solid (%) |              |             |                  | Sugar concentration in the hydrolysate (g/L) |             |             |             |             |
|----------------------------------------|------------|--------------------|-----------------------------|--------------------------------|--------------|-------------|------------------|----------------------------------------------|-------------|-------------|-------------|-------------|
|                                        |            |                    |                             | Mannan                         | Glucan       | Xylan       | AIS <sup>c</sup> | Man                                          | Gal         | Xyl         | Ara         | Glu         |
| <i>Un</i> <sup>d</sup>                 | -          | 100                | -                           | 52.46 ± 1.51                   | 8.40 ± 0.52  | 2.05 ± 0.22 | 19.54 ± 1.56     | -                                            | -           | -           | -           | -           |
| 1.5%                                   | 30         | 81.1 ± 0.1         | 0.99                        | 60.39 ± 1.67                   | 10.01 ± 0.10 | 2.46 ± 0.20 | 23.72 ± 0.94     | 13.54 ± 2.10                                 | 2.12 ± 0.22 | 1.03 ± 0.16 | 1.58 ± 0.03 | 0.51 ± 0.01 |
| 3.0%                                   | 30         | 73.5 ± 0.4         | 1.19                        | 57.32 ± 0.72                   | 8.99 ± 1.21  | 1.38 ± 0.19 | 22.39 ± 0.88     | 23.28 ± 1.65                                 | 2.71 ± 0.12 | 1.88 ± 0.07 | 1.38 ± 0.02 | 0.67 ± 0.03 |
| 3.5%                                   | 30         | 71.6 ± 0.1         | 1.32                        | 55.80 ± 1.32                   | 9.72 ± 0.15  | 0.83 ± 0.09 | 27.84 ± 1.38     | 27.65 ± 0.37                                 | 3.01 ± 0.08 | 2.21 ± 0.01 | 1.41 ± 0.06 | 0.78 ± 0.08 |
| 4.5%                                   | 30         | 71.6 ± 0.7         | 1.29                        | 53.36 ± 1.12                   | 10.13 ± 0.21 | 1.05 ± 0.04 | 29.22 ± 1.54     | 29.93 ± 1.83                                 | 2.98 ± 0.18 | 2.48 ± 0.33 | 1.31 ± 0.08 | 0.84 ± 0.02 |
| 1.5%                                   | 60         | 72.8 ± 0.5         | 1.30                        | 58.99 ± 0.99                   | 9.66 ± 0.05  | 1.49 ± 0.10 | 27.28 ± 1.43     | 27.12 ± 0.13                                 | 3.14 ± 0.03 | 2.57 ± 0.13 | 1.68 ± 0.02 | 0.87 ± 0.01 |
| 3.0%                                   | 60         | 70.2 ± 0.2         | 1.44                        | 54.10 ± 2.20                   | 10.28 ± 0.76 | 0.98 ± 0.10 | 27.07 ± 0.57     | 41.76 ± 1.09                                 | 3.55 ± 0.05 | 3.45 ± 0.24 | 1.50 ± 0.03 | 1.07 ± 0.06 |
| 3.5%                                   | 60         | 70.4 ± 0.6         | 1.64                        | 51.34 ± 3.10                   | 10.32 ± 0.56 | 0.81 ± 0.14 | 25.05 ± 2.28     | 46.22 ± 0.44                                 | 3.58 ± 0.06 | 3.26 ± 0.21 | 1.48 ± 0.03 | 1.14 ± 0.11 |
| 4.5%                                   | 60         | 62.3 ± 0.9         | 1.70                        | 55.25 ± 1.18                   | 10.42 ± 0.40 | 0.40 ± 0.07 | 30.86 ± 3.09     | 49.54 ± 0.20                                 | 3.38 ± 0.02 | 3.10 ± 0.34 | 1.39 ± 0.02 | 1.34 ± 0.12 |

389 <sup>a</sup>RIS: recovered insoluble solids; <sup>b</sup>R<sub>0</sub>: combined severity factor; <sup>c</sup>AIS: acid insoluble solids; <sup>d</sup>Un: untreated açai seed from lot 2.

390 From Table 2, there is a correlation between the severity of the acid hydrolysis,  
391 the percentage of insoluble solids recovered, and the concentration of mannose  
392 released, indicating that to a certain extent, more biomass components are transferred  
393 into the liquid phase when the severity is higher, which was expected. The lowest  
394 severity condition ( $R_0$  0.99) resulted in 81.1% recovered solids, while for the most  
395 severe condition, this value decreased to 62.3%. Similarly, the diluted-acid hydrolysis  
396 of nondilapidated spent coffee grounds—a residue rich in mannan—resulted in 85–  
397 70% solids recovery after hydrolysis, with acid concentrations ranging from 1–5% v/v  
398 and residence times from 30–60 min at 95 °C (Juarez et al., 2018). The duration of the  
399 treatment, from 30–60 min, had an important impact on the release of sugars. Mannose  
400 concentration increased according to the increase in acid concentration from 1.5% to  
401 4.5%  $H_2SO_4$ , ranging from 13.54 g/L to 29.93 g/L (9.4% to 20.7% yield) for hydrolysis  
402 carried out for 30 min and from 27.12 g/L to 49.54 g/L (18.8% to 34.4% yield) when  
403 treatments were carried out for 60 min. The same pattern could be observed for  
404 glucose.

405 Even though mannose and glucose concentrations increased with a higher  
406 severity, the xylose, arabinose and galactose concentrations in the hydrolysates  
407 decreased during the most severe conditions, indicating the partial degradation of these  
408 sugars in the liquid fraction. This is in accordance with studies that reported a lower  
409 activation energy for the hydrolysis of xylan (101 kJ/mol) than for mannan (113  
410 kJ/mol) and cellobiose (110 kJ/mol) hydrolysis (Canettieri et al., 2007; Mosier et al.,  
411 2002; Nattorp et al., 1999). It is well known that the combination of high temperature,  
412 acidic pH, and prolonged reaction time may contribute to the formation of undesired  
413 compounds derived from sugar dehydration, such as furfural and  
414 hydroxymethylfurfural, as well as the degradation of phenolic structures (Ferreira-

415 Leitão et al., 2010; Oral et al., 2014). Therefore, to evaluate acid hydrolysis conditions,  
416 one should take into account both the sugar release yield and formation of degradation  
417 products. Moreover, it is also important to calculate the total mannose recovery because  
418 higher severity treatments may result in a higher release of mannose, but also in a  
419 partial degradation of this sugar, causing an overall loss of the desired product. In the  
420 present study, low amounts of hydroxymethyl furfural were quantified in the  
421 hydrolysates and were equivalent to 56 mg/L, which was detected only in the most  
422 severe condition (4.5% H<sub>2</sub>SO<sub>4</sub>, 60 min). Very low concentrations of acetic acid were  
423 quantified in the hydrolysates from all conditions, which were in the range of 60–210  
424 mg/L. Other compounds, such as furfural, vanillin, gallic, ferulic, cinnamic, and  
425 hydrobenzoic acids were monitored but were either under the limit of quantification or  
426 not detected. Figure 3 shows the mannose recovery balance in both the solid and liquid  
427 fractions obtained after the acid hydrolysis of seeds for each condition. Biomass  
428 characterization protocols are multistep and very laborious procedures, but overall,  
429 over 95% of the original mannose content could be detected either in the hydrolysate or  
430 preserved in the solid fraction, which is in good agreement with the absence/low  
431 concentration of the degradation products detected (Figure 3). The high mannose  
432 recovery indicates that at the temperature evaluated, the acid concentration and reaction  
433 duration were at an acceptable range for mannose stability.

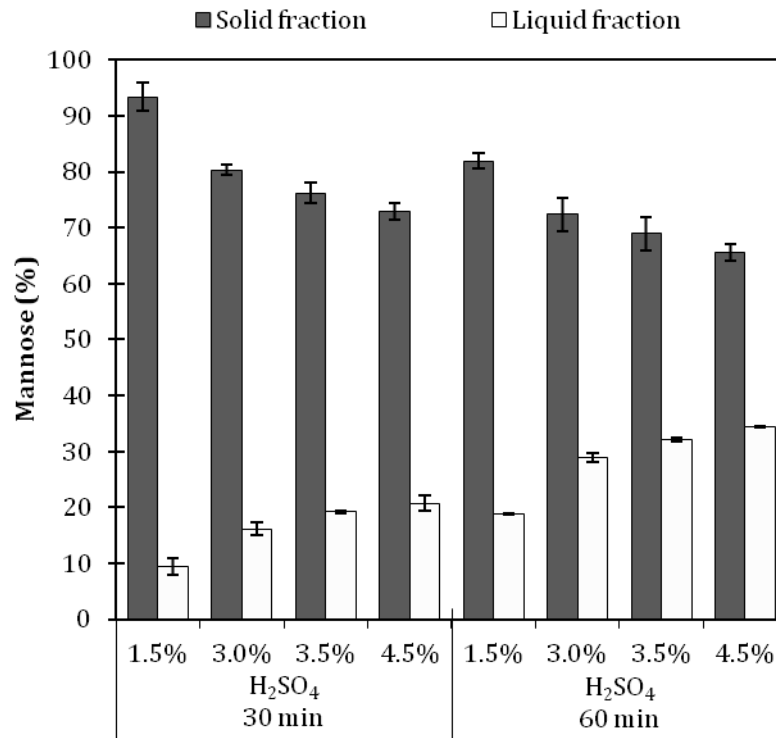

434

435 **Figure 3.** Percentage of mannose recovery from the milled açai seeds after acid hydrolysis with  
436 diluted H<sub>2</sub>SO<sub>4</sub> (1.5%–4.5%) for 30 and 60 min of retention time at 121 °C. White bars:  
437 Percentage of mannose recovered in the liquid fraction after acid hydrolysis. Dark gray bars:  
438 mannose content retained in the solid fraction after acid hydrolysis.

439

440 Optimized diluted-acid hydrolysis of xylans at mild temperatures can reach  
441 yields of 80–95%, while cellulose is much more resistant to diluted acid attacks at  
442 temperatures under 200 °C (Wyman et al., 2004). Açai seed mannan's susceptibility to  
443 diluted-acid hydrolysis seems to lie in between because 34.3% of the mannan could be  
444 converted into mannose during the most severe condition evaluated. Reducing sugars  
445 when in solution exist as a mix of cyclic structures, which are more resistant to  
446 degradation, and as an open chain, which is the more reactive acyclic carbonyl form  
447 (Angyal, 1984). In polysaccharides, the sugar at the chain end or ramified end will exist  
448 in ring and open chain structures, being more susceptible to degradation (Nattorp et al.,

449 1999). Additionally, it has been shown that at room temperature, glucose and mannose  
450 present a lower carbonyl percentage than galactose, xylose, and arabinose (Hayward  
451 and Angyal, 1977). These data correlate to the low concentration of the sugar  
452 degradation products found in the hydrolysates and to the fact that water-insoluble and  
453 linear mannans, which are likely cellulose, can form crystalline structures (Chanzy et  
454 al., 1987, 1984) that are recalcitrant and resistant to diluted sulfuric acid attack;  
455 however, other amorphous hemicelluloses, such as galactoarabinoxylans, are known to  
456 be highly susceptible to diluted-acid hydrolysis (Wyman et al., 2004).

457         The current knowledge of the chemical hydrolysis of mannan is limited because  
458 there are only a few reports of mannose production from vegetal biomass through acid  
459 hydrolysis. One study (Fan et al., 2014) evaluated the diluted sulfuric acid hydrolysis  
460 under microwave irradiation of deproteinated palm kernel cake (PKC) containing  
461 55.71% mannan; the results of that study showed a mannose yield of 92% at the  
462 optimized condition of 148 °C, 0.75 N H<sub>2</sub>SO<sub>4</sub> (equivalent to 3.5% w/w), 10.5 min, and  
463 a solid:liquid (S:L) ratio of 1:50. Besides the use of microwave irradiation assistance,  
464 higher temperatures and the possible differences between deproteinated PKC and açai  
465 seed recalcitrance to acid attack, the higher mannose yields achieved for PKC acid  
466 hydrolysis may have been favored by the low substrate concentration evaluated (S:L  
467 ratio of 1:50). In the present study, a S:L of 1:4 was used because a low substrate  
468 concentration leads to extremely diluted hydrolysates that are not feasible for industrial  
469 applications.

470         The mild conditions for the acid hydrolysis of mannan that were evaluated were  
471 not sufficient to efficiently break down the recalcitrance of this polysaccharide because  
472 65–93% of the original mannose content remained in the solids recovered from the  
473 seed's diluted-acid hydrolysis (Figure 3). However, increasing the process' severity

474 could result in the high formation of degradation products along with the generation of  
475 very toxic and corrosive streams, which should be avoided. Therefore, a sequential  
476 process of enzymatic hydrolysis with the mannanases of the recovered solids was  
477 evaluated to attempt to further release the mannose.

478

### 479 3.3. Enzymatic hydrolysis for mannose release from recovered solids from acid 480 hydrolysis

481 After a preliminary screening of several commercial and lab-made enzyme  
482 preparations, the enzyme mannanase BGM “Amano” 10 (Amano Enzyme Inc., Japan)  
483 was selected as the most efficient for the hydrolysis of açai seed’s mannan. The  
484 enzyme preparation, which is commercially available as a powder, had activities of  $\beta$ -  
485 mannanase and  $\beta$ -mannosidase of 26,750 IU/g and 15.05 IU/g, respectively. Figure 4  
486 shows the mannose yields obtained with the enzymatic hydrolysis of the acid-treated  
487 seed samples compared with the native milled seeds.

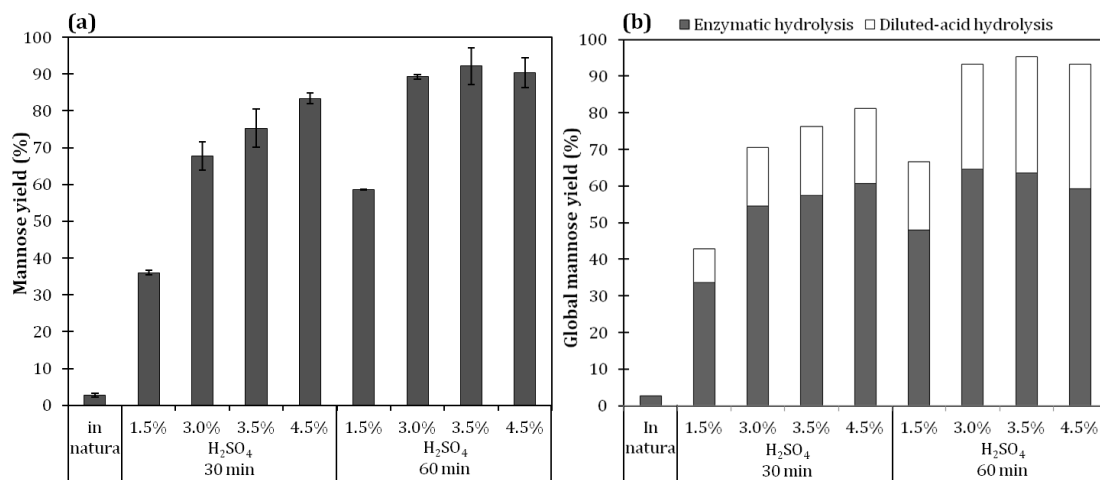

488

489

490 **Figure 4.** (a) Mannose yield obtained after 72 h of enzymatic hydrolysis of *in natura* and  
491 previously acid-hydrolyzed açai seed milled samples; (b) Global mannose yield calculated in

492 relation to the initial mannose content in the native seed. The assays were conducted with 2%  
493 solids and 400 UI of mannanase BGM “Amano” 10 per gram of sample.

494

495 The native açai seed sample was highly recalcitrant to the enzymatic attack,  
496 resulting in a less than 3% mannose yield. Nonetheless, after the material had been  
497 partially digested by sulfuric acid, it became much more susceptible to the attack of the  
498 mannanases, resulting in a 90% mannose yield for samples that were treated for 60 min  
499 with 3%, 3.5%, and 4.5% sulfuric acid. Consequently, the recovery of mannose could  
500 be substantially increased through a sequential process of diluted-acid hydrolysis  
501 followed by enzymatic hydrolysis, potentially reaching over 93% global mannose  
502 recovery for the most favorable conditions when using both the acid and enzymatic  
503 hydrolysis steps (Figure 4b).

504 Data regarding the enzymatic hydrolysis of mannan into mannose is scarce in  
505 the literature because there are not many abundant agroindustrial residues rich in this  
506 polysaccharide. So far, there have been no studies in the literature exploring mannose  
507 production from açai seeds, but there are some reports with other residues, such as  
508 PKC, copra meal, and spent coffee grounds. A study that evaluated the enzymatic  
509 hydrolysis of PKC, which contains 35.2% of mannan, reported that this residue was  
510 readily hydrolyzed into mannose with a mixture of two enzymes (Mannaway and  
511 Gammanase) with no previous treatment, resulting in an 87% conversion rate of  
512 mannan into mannose after 96 h (Cerveró et al., 2010). Most of mannan in PKC  
513 consists of a (1→4)-linked mannan with a low degree of substitution with galactose  
514 (Düsterhöft et al., 1991), which is the same structure that we hypothesized for the  
515 mannan in açai seeds. However, in the present study, native açai seeds were poorly  
516 hydrolyzed by mannanases, reaching only 3% conversion of mannan to mannose,



517 suggesting that these residues have distinctive mannan structures and/or the mannan is  
518 less accessible in açai seeds because of interactions with other structural and  
519 nonstructural components.

520 The set of experiments presented in Figure 4 were performed with a 2% açai  
521 seed content (w/w), which led to high yield but also to hydrolysates containing low  
522 concentrations of mannose of about 11 g/L of at the best conditions. To have an  
523 effective industrial process, it is of the utmost importance to work on concentrated  
524 media to reduce the capital cost of equipment and the use of water. Therefore, the  
525 effect of solids loading on the enzymatic hydrolysis was evaluated in a range of 2–20%  
526 (Figure 5). Samples treated with 3% acid for 60 min were selected for the assays  
527 because the seeds treated with 3%, 3.5%, and 4.5% of sulfuric acid were equally  
528 susceptible to mannanase attack (Figure 4), and this condition has a lower impact on  
529 the use of H<sub>2</sub>SO<sub>4</sub>, formation of acidic effluents, and degradation products.

530

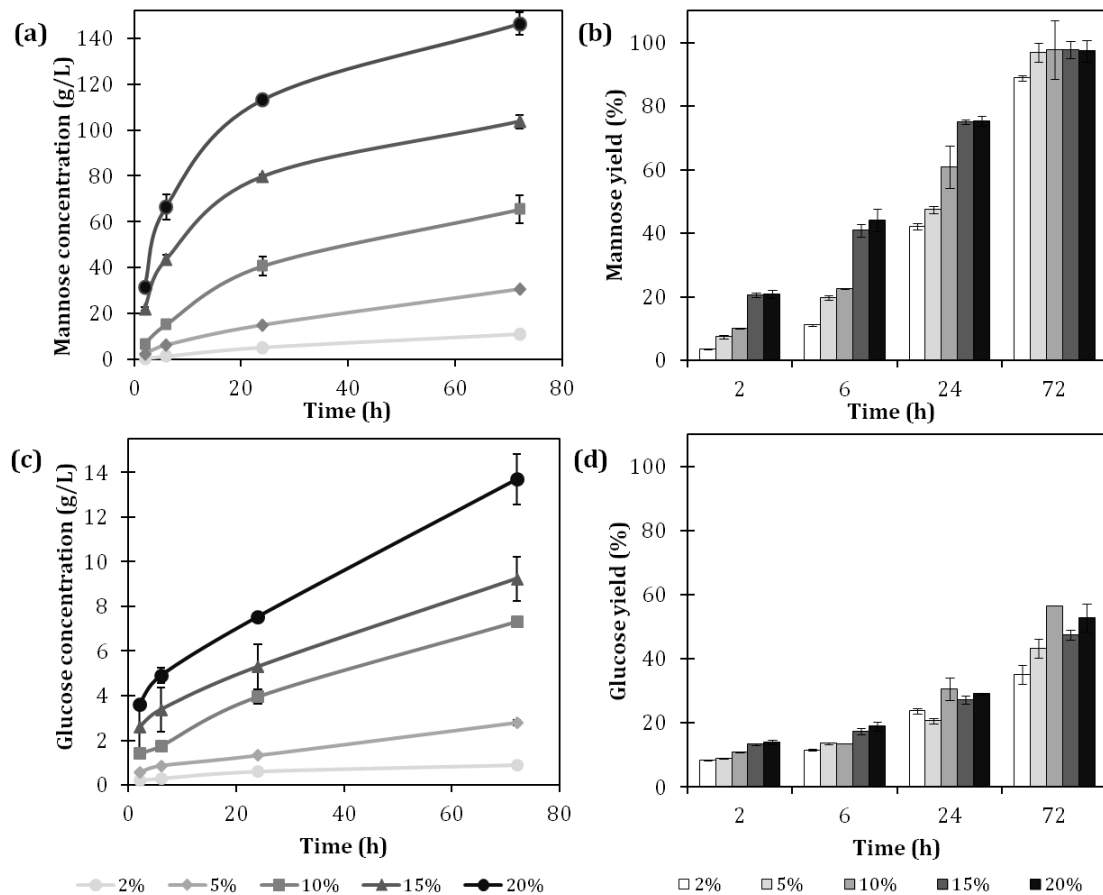

531

532 **Figure 5.** Enzymatic hydrolysis profile at the different solid contents of acid-  
533 hydrolyzed açai seeds. (a) Mannose concentration; (b) mannose yield; (c) glucose  
534 concentration; (d) glucose yield. The assays were conducted with 400 UI of mannanase  
535 BGM “Amano” 10 per gram of sample. The samples were priory treated with 3%  
536 H<sub>2</sub>SO<sub>4</sub> for 60 min at 121 °C.

537

538 The enzymatic hydrolysis in the assays containing 2%, 5%, 10%, 15%, and 20%  
539 of acid-treated açai seeds resulted in mannose concentrations, respectively, of 9.8, 30.6,  
540 65.4, 103.7, and 146.3 g/L after 72 h. Regardless of the solid content evaluated (from  
541 5–20%), the conversion of mannan content into mannose reached over 95% (Figure  
542 5b). The high yields achieved indicate that the endomannanase and  $\beta$ -mannosidase  
543 balance in the commercial enzymatic preparation used is adequate for the complete

544 hydrolysis of açai seed's mannan. To the best of our knowledge, the mannose  
545 concentration reached in the assays with 20% solids is by far the highest reported in the  
546 literature for the enzymatic hydrolysis of an agricultural residue.

547       Only mannose and glucose were detected in the hydrolysates by HPLC analysis.  
548 At 72 h, the glucose concentrations reached 0.9, 2.8, 7.3, 9.2, and 13.7 g/L for the  
549 assays containing 2%, 5%, 10%, 15%, and 20% of acid-hydrolyzed açai seed,  
550 respectively. It is very interesting to note that roughly, a glucose:mannose ratio of 1:10  
551 could be observed (Supplementary Table 1). Considering that the enzyme used is a  
552 mannanase with nearly no cellulase activity, we hypothesize that the glucose released  
553 during enzymatic hydrolysis is derived from the mannan structure. The  
554 glucose:mannose ratio of 1:10 derived from mannan hydrolysis is in agreement with  
555 the definition of a "true" mannan, which relates to polysaccharides with more than 85–  
556 95% mannose content and a high degree of uniformity in the structure (Aspinall, 1959;  
557 Stephen, 1983).

558       The mannose and glucose concentrations obtained at 72 h of hydrolysis showed  
559 a linear relationship to the initial solid content, indicating that no significative  
560 inhibition effect took place during mannan hydrolysis (Supplementary Figure 1). These  
561 data differ from what is typically reported for the enzymatic hydrolysis of cellulosic  
562 substrates because it has been shown that by increasing the substrate concentration, the  
563 corresponding yield decreases (Kristensen et al., 2009). Although the 72 h mannose  
564 yields reached a plateau for all the solids content evaluated, the mannan conversion rate  
565 was faster in hydrolysis assays with higher solid contents, which also has an opposite  
566 effect to what is observed in the hydrolysis of fibrous cellulose-rich materials. This fact  
567 reinforces the observation that açai seed mannan hydrolysis occurred in a pattern that  
568 differs greatly from the enzymatic hydrolysis of lignocellulosic materials by cellulases,

569 which are affected by the “solids effect” including substrate effects, product inhibition,  
570 water content constraints, enzyme adsorption characteristics, and others (Modenbach  
571 and Nokes, 2013).

572 A similar evaluation was performed for the enzymatic hydrolysis of PKC using  
573 different substrate concentrations from 5–20% (w/v), reaching, at optimized conditions,  
574 a mannose concentration of 67.5 g/L. In agreement with our observation, Shukor et al.,  
575 (2016) reported a direct increase in the production of simple sugars with an increase of  
576 the PKC content, which indicated that no substrate inhibition effect was taking place.  
577 However, the authors did not present a hydrolysis profile over time or the PKC  
578 characterized, which restricts other comparisons with the present study.

579 Besides the limited current knowledge about the chemical and enzymatic  
580 mannan depolymerization and mode of action of mannanases, the results presented in  
581 the current study demonstrate that mannan from açai seeds could be a low-cost source  
582 to produce mannose in high yields and concentrations. The development of this field  
583 could fill the present market demand for the cost-effective production of mannose and  
584 its derivatives (Hu et al., 2016), which is hindered by the scarce sources of mannose  
585 and development of appropriate methods.

586

#### 587 **4. Conclusions**

588 In this pioneer study, a sequential process of diluted-acid and enzymatic  
589 hydrolysis of açai seeds was developed to convert its high mannan content into  
590 mannose. Mannanases-catalyzed hydrolysis of acid-treated seeds resulted in 146 g/L of  
591 mannose and a 96.8% yield. To the best of our knowledge, this is by far the highest  
592 concentration of mannose reported for the enzymatic hydrolysis of an agricultural  
593 residue, which could open new perspectives for mannose use as a platform molecule.

594 Finally, giving a proper destination to açai seeds could add value to the whole açai  
595 productive chain while promoting development in the Amazon region.

596

### 597 **Acknowledgment**

598 This work was supported by the Serrapilheira Institute (grant number Serra-1708-  
599 15009) and the Coordination for the Improvement of Higher Education Personnel  
600 (CAPES – grant AUXPE 0415/2016). We want to thank M.Sc Leandro Barbosa and  
601 the Bioethanol Laboratory at the Federal University of Rio de Janeiro for their  
602 assistance with the HPAEC-PAD analysis and the Laboratory of Combinatorial  
603 Catalysis at the National Institute of Technology for the XRD measurements. Açai  
604 Amazonas Ltd. and Amano Enzyme Inc. are thanked for providing açai seeds and  
605 enzyme samples, respectively. M.Sc. Ronaldo Rodrigues is acknowledged for his  
606 assistance with the graphical abstract. Ingrid Santos Miguez and João Silva were  
607 granted scholarships, respectively, from Fundação Carlos Chagas Filho de Amparo à  
608 Pesquisa do Estado do Rio de Janeiro (FAPERJ) and the National Council for  
609 Scientific and Technological Development (PIBITI/CNPq).

610

### 611 **References**

612 Altman, R.F.A., 1956. Estudo químico de plantas amazônicas. Boletim Técnico do  
613 Instituto Agrônomo do Norte - nº31 1, 1–10.  
614 Angyal, S.J., 1984. The Composition of reducing sugars in solution. Adv. Carbohydr.  
615 Chem. Biochem. 42, 15–68.  
616 Ariandi, Yopi, Meryandini, A., 2015. Enzymatic hydrolysis of copra meal by  
617 mannanase from *Streptomyces* sp. BF3.1 for the production of  
618 manno oligosaccharides. HAYATI J. Biosci. 22, 79–86.

- 619 Aspinall, G.O., 1959. Structural chemistry of the hemicelluloses. *Adv. Carbohydr.*  
620 *Chem.* 14, 429–468.
- 621 Bento, J.F., Mazzaro, I., De Almeida Silva, L.M., De Azevedo Moreira, R., Ferreira,  
622 M.L.C., Reicher, F., De Oliveira Petkowicz, C.L., 2013. Diverse patterns of cell  
623 wall mannan/galactomannan occurrence in seeds of the Leguminosae. *Carbohydr.*  
624 *Polym.* 92, 192–199.
- 625 Bradbury, A.G.W., Halliday, D.J., 1990. Chemical structures of green coffee bean  
626 polysaccharides. *J. Agric. Food Chem.* 38, 389–392.
- 627 Canettieri, E.V., Rocha, G.J. de M., de Carvalho, J.A., de Almeida e Silva, J.B., 2007.  
628 Optimization of acid hydrolysis from the hemicellulosic fraction of *Eucalyptus*  
629 *grandis* residue using response surface methodology. *Bioresour. Technol.* 98, 422–  
630 428.
- 631 Cerveró, J.M., Skovgaard, P.A., Felby, C., Sørensen, H.R., Jørgensen, H., 2010.  
632 Enzymatic hydrolysis and fermentation of palm kernel press cake for production of  
633 bioethanol. *Enzyme Microb. Technol.* 46, 177–184.
- 634 Chanzy, H., Pérez, S., Miller, D.P., Paradossi, G., Winter, W.T., 1987. An electron  
635 diffraction study of mannan I: crystal and molecular structure. *Macromolecules* 20,  
636 2407–2413.
- 637 Chanzy, H.D., Grosrenaud, A., Vuong, R., Mackie, W., 1984. The crystalline  
638 polymorphism of mannan in plant cell walls and after recrystallisation. *Planta* 161,  
639 320–329.
- 640 Da Silva, A.S.A., Inoue, H., Endo, T., Yano, S., Bon, E.P.S., 2010. Milling pretreatment  
641 of sugarcane bagasse and straw for enzymatic hydrolysis and ethanol fermentation.  
642 *Bioresour. Technol.* 101, 7402–7409.
- 643 Düsterhöft, E-M., Voragen, A.G.J., Engels, F.M., 1991. Non-starch polysaccharides

- 644 from sunflower (*Helianthus annuus*) meal and palm kernel (*Elaeis guineensis*)  
645 meal—preparation of cell wall material and extraction of polysaccharide fractions.  
646 J. Sci. Food Agric. 55, 411–422.
- 647 Fan, S.P., Jiang, L.Q., Chia, C.H., Fang, Z., Zakaria, S., Chee, K.L., 2014. High yield  
648 production of sugars from deproteinated palm kernel cake under microwave  
649 irradiation via dilute sulfuric acid hydrolysis. Bioresour. Technol. 153, 69–78.
- 650 Ferreira-Leitão, V., Cruz Perrone, C., Rodrigues, J., Machado Franke, A.P., Macrelli,  
651 S., Zacchi, G., 2010. An approach to the utilisation of CO<sub>2</sub> as impregnating agent  
652 in steam pretreatment of sugar cane bagasse and leaves for ethanol production.  
653 Biotechnol. Biofuels 3, 1–8.
- 654 Fioravanti, C., 2013. Açai, do pé para o lanche. Pesquisa FAPESP 64–68.
- 655 French, A.D., Santiago, M., 2013. Cellulose polymorphy, crystallite size, and the Segal  
656 Crystallinity Index. Cellulose 20, 583–588.
- 657 Hayward, L.D., Angyal, S.J., 1977. A symmetry rule for the circular dichroism of  
658 reducing sugars, and the proportion of carbonyl forms in aqueous solutions  
659 thereof. Carbohydr. Res. 53, 13–20.
- 660 Hu, X., Shi, Y., Zhang, P., Miao, M., Zhang, T., Jiang, B., 2016. D-mannose:  
661 properties, production, and applications: an overview. Compr. Rev. Food Sci. Food  
662 Saf. 15, 773–785.
- 663 Jakobek, L., 2015. Interactions of polyphenols with carbohydrates, lipids and proteins.  
664 Food Chem. 175, 556–567.
- 665 Juarez, G.F.Y., Pabiloña, K.B.C., Manlangit, K.B.L., Go, A.W., 2018. Direct dilute acid  
666 hydrolysis of spent coffee grounds: a new approach in sugar and lipid recovery.  
667 Waste and Biomass Valorization 9, 235–246.
- 668 Kristensen, J.B., Felby, C., Jørgensen, H., 2009. Yield-determining factors in high-

- 669 solids enzymatic hydrolysis of lignocellulose. *Biotechnol. Biofuels* 2, 11.
- 670 Kusakabe, I., Zama, M., Park, G.G., Tubaki, K., Murakami, K., 1987. Preparation of  $\beta$ -  
671 1,4-mannobiose from white copra meal by a mannanase from *Penicillium*  
672 *purpurogenum*. *Agric. Biol. Chem.* 51, 2825–2826.
- 673 Lim, W.S., Lee, J.W., 2013. Influence of pretreatment condition on the fermentable  
674 sugar production and enzymatic hydrolysis of dilute acid-pretreated mixed  
675 softwood. *Bioresour. Technol.* 140, 306–311.
- 676 Makkee, M., Kieboom, A.P.G., Bekkum, H. van, 1985. Production methods of D-  
677 mannitol. *Starch/Stärke* 37, 136–141.
- 678 Melo, P.S., Arrivetti, L.O.R., Alencar, S.M, Skibsted, L.H, 2016. Antioxidative and  
679 prooxidative effects in food lipids and synergism with  $\alpha$ -tocopherol of açai seed  
680 extracts and grape rachis extracts. *Food Chem.* 213, 440–449.
- 681 Mishra, D.K., Hwang, J.S., 2013. Selective hydrogenation of D-mannose to D-mannitol  
682 using NiO-modified TiO<sub>2</sub> (NiO-TiO<sub>2</sub>) supported ruthenium catalyst. *Appl. Catal.*  
683 *A Gen.* 453, 13–19.
- 684 Modenbach, A.A., Nokes, S.E., 2013. Enzymatic hydrolysis of biomass at high-solids  
685 loadings - A review. *Biomass and Bioenergy* 56, 526–544.
- 686 Moreira, L.R.S., Filho, E.X.F., 2008. An overview of mannan structure and mannan-  
687 degrading enzyme systems. *Appl. Microbiol. Biotechnol.* 79, 165–178.
- 688 Mosier, N.S., Ladisch, C.M., Ladisch, M.R., 2002. Characterization of acid catalytic  
689 domains for cellulose hydrolysis and glucose degradation. *Biotechnol. Bioeng.* 79,  
690 610–618.
- 691 Nattorp, A., Graf, M., Spühler, C., Renken, A., 1999. Model for random hydrolysis and  
692 end degradation of linear polysaccharides: Application to the thermal treatment of  
693 mannan in solution. *Ind. Eng. Chem. Res.* 38, 2919–2926.



- 694 Nogueira, A.K.M., De Santana, A.C., Garcia, W.S., 2013. A dinâmica do mercado de  
695 açáí fruto no Estado do Pará: De 1994 a 2009. *Rev. Ceres* 60, 324–331.
- 696 Oliveira, J.A.R., Komesu, A., Maciel Filho, R., 2013. Hydrothermal pretreatment for  
697 enhancing enzymatic hydrolysis of seeds of açáí (*Euterpe oleracea*) and sugar  
698 recover. *Chem. Eng. Trans.* 64, 2656–2663.
- 699 Oliveira, J.A.R., Martins, L.H.S., Komesu, A., Maciel Filho, R., 2015. Evaluation of  
700 alkaline delignification (NaOH) of açáí seeds (*Eutherpe oleracea*) treated with  
701 H<sub>2</sub>SO<sub>4</sub> dilute and effect on enzymatic hydrolysis. *Chem. Eng. Trans.* 43, 499–504.
- 702 Oral, R.A., Mortas, M., Dogan, M., Sarioglu, K., Yazici, F., 2014. New approaches to  
703 determination of HMF. *Food Chem.* 143, 367–370.
- 704 Otieno, D.O., Ahring, B.K., 2012. The potential for oligosaccharide production from the  
705 hemicellulose fraction of biomasses through pretreatment processes:  
706 Xylooligosaccharides (XOS), arabinooligosaccharides (AOS), and  
707 mannoooligosaccharides (MOS). *Carbohydr. Res.* 360, 84–92.
- 708 Pessoa, J.D.C., Arduin, M., Martins, M.A., de Carvalho, J.E.U., 2010. Characterization  
709 of açáí (*E. oleracea*) fruits and its processing residues. *Brazilian Arch. Biol.*  
710 *Technol.* 53, 1451–1460.
- 711 Pompeu, D.R., Silva, E.M., Rogez, H., 2009. Optimisation of the solvent extraction of  
712 phenolic antioxidants from fruits of *Euterpe oleracea* using Response Surface  
713 Methodology. *Bioresour. Technol.* 100, 6076–6082.
- 714 Rambo, M.K.D., Schmidt, F.L., Ferreira, M.M.C., 2015. Analysis of the lignocellulosic  
715 components of biomass residues for biorefinery opportunities. *Talanta* 144, 696–  
716 703.
- 717 Rodríguez-Zúñiga, U.F., Lemo, V., Farinas, C.S., Neto, V.B., Couri, S., 2008.  
718 Evaluation of agroindustrial residues as substrates for cellulolytic enzymes

- 719 production under solid state fermentation. 7<sup>th</sup> Brazilian MRS Meeting.  
720 (<https://www.alice.cnptia.embrapa.br/alice/handle/doc/26632>)
- 721 Rungrassamee, W., Kingcha, Y., Srimarut, Y., Maibunkaew, S., Karoonuthaisiri, N.,  
722 Visessanguan, W., 2014. Mannooligosaccharides from copra meal improves  
723 survival of the Pacific white shrimp (*Litopenaeus vannamei*) after exposure to  
724 *Vibrio harveyi*. Aquaculture 434, 403–410.
- 725 Scheller, H.V., Ulvskov, P., 2010. Hemicelluloses. Annu. Rev. Plant Biol. 61, 263–289.
- 726 Shukor, H., Abdeshahian, P., Al-Shorgani, N.K.N., Hamid, A.A., Rahman, N.A., Kalil,  
727 M.S., 2016. Enhanced mannan-derived fermentable sugars of palm kernel cake by  
728 mannanase-catalyzed hydrolysis for production of biobutanol. Bioresour. Technol.  
729 218, 257–264.
- 730 Sluiter, A., Hames, B., Ruiz, R.O., Scarlata, C., Sluiter, J., Templeton, D., Crocker, D.,  
731 2012. Determination of structural carbohydrates and lignin in biomass, National  
732 Renewable Energy Laboratory Analytical Procedure.
- 733 Sluiter, A., Ruiz, R., Scarlata, C., Sluiter, J., Templeton, D., 2008. Determination of  
734 extractives in biomass, National Renewable Energy Laboratory Analytical  
735 Procedure.
- 736 Srivastava, P.K., Kapoor, M., 2017. Production, properties, and applications of endo- $\beta$ -  
737 mannanases. Biotechnol. Adv. 35, 1–19.
- 738 Stephen, A. M., 1983. Other plant polysaccharides, in: Aspinall, G.O. (Ed.), The  
739 polysaccharides. Academic Press, London, pp. 97–193.
- 740 van Zyl, W.H., Rose, S.H., Trollope, K., Görgens, J.F., 2010. Fungal  $\beta$ -mannanases:  
741 Mannan hydrolysis, heterologous production and biotechnological applications.  
742 Process Biochem. 45, 1203–1213.
- 743 Waksman, A., Stevens, S.R., 1930. A System of proximate chemical analysis of plant

744 materials. *Ind. Eng. Chem. Anal. Ed.* 2, 167–173.

745 Wycoff, W., Luo, R., Schauss, A.G., Neal-Kababick, J., Sabaa-Srur, A.U.O., Maia,  
746 J.G.S., Tran, K., Richards, K.M., Smith, R.E., 2015. Chemical and nutritional  
747 analysis of seeds from purple and white açai (*Euterpe oleracea* Mart.). *J. Food*  
748 *Compos. Anal.* 41, 181–187.

749 Wyman, C.E., Decker, S.R., Himmel, M.E., Brady, J.W., Skopec, C.E., Viikari, L.,  
750 2004. Hydrolysis of cellulose and hemicellulose, in: Dumitriu, S. (Ed.),  
751 *Polysaccharides: Structural diversity and functional versatility*. Marcel Dekker,  
752 Inc., New York, pp. 995–1033.

753 Yamaguchi, K.K.D.L., Pereira, L.F.R., Lamarão, C.V., Lima, E.S., Da Veiga-Junior,  
754 V.F., 2015. Amazon acai: Chemistry and biological activities: A review. *Food*  
755 *Chem.* 179, 137–151.

756
